# Supplementary figures and images for: Artistoo, a library to build, share, and explore simulations of cells and tissues in the web browser
Source: eLife journal article supplement (doi:10.7554/elife.61288), 2021-04-09

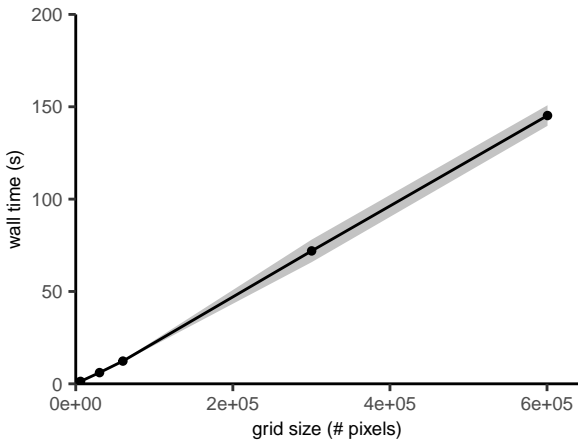

Supplement: supp [file elife-61288-supp-v1.zip]
